# Supplementary material
Source: ML conference proceedings conference paper supplement (https://www.ecva.net/papers/eccv_2020/papers_ECCV/html/123590494_ECCV_2020_paper.php)

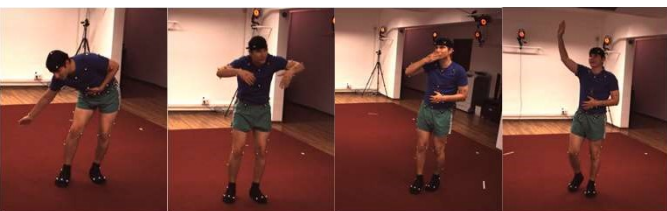

(a) Training Action : Greet

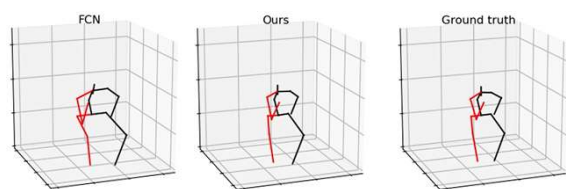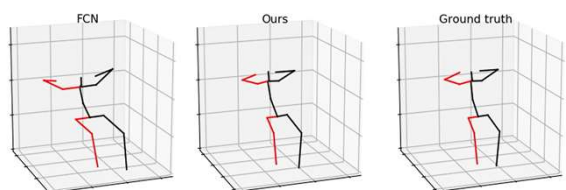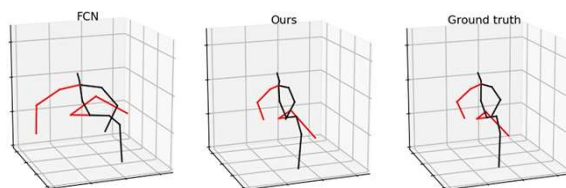

(c) Test Action: Sit

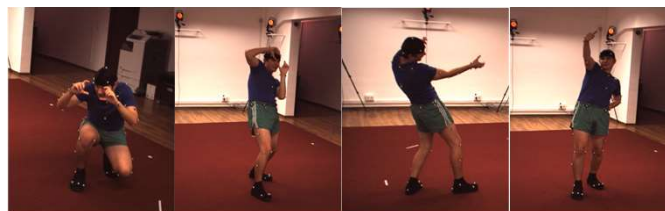

(b) Training Action : Take Photos

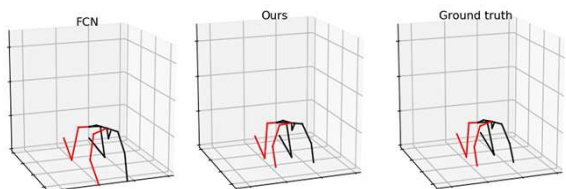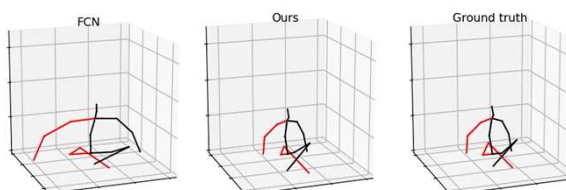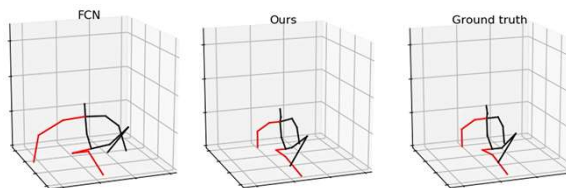

(d) Test Action: Sit Down

Supplement: Supplementary file 2 [file 123590494-supp.zip]

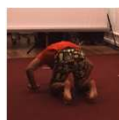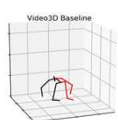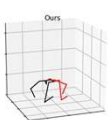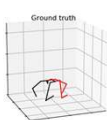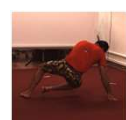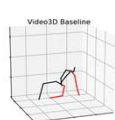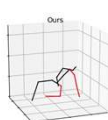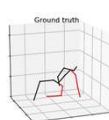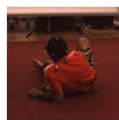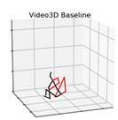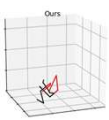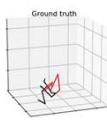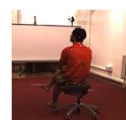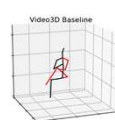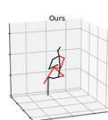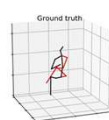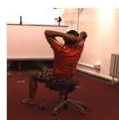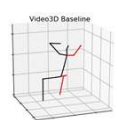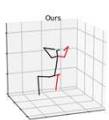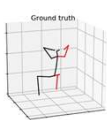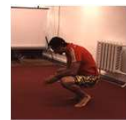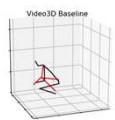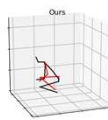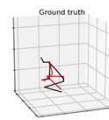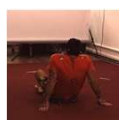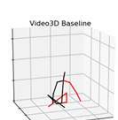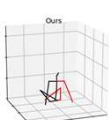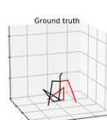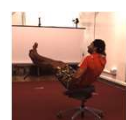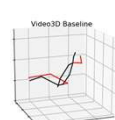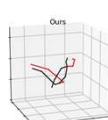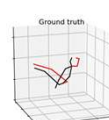

(a)

(b)

(c)

(d)

(e)

(f)

(g)

(h)

Supplement: Supplementary file 4 [file 123590494-supp.zip]
